# Supplementary material for: Comprehensive analyses of glycolysis-related lncRNAs for ovarian cancer patients
Source: Springer Nature journal article supplement (doi:10.1186/s13048-021-00881-2), 2021-09-24
Supplement: MOESM4 [file 19716304]

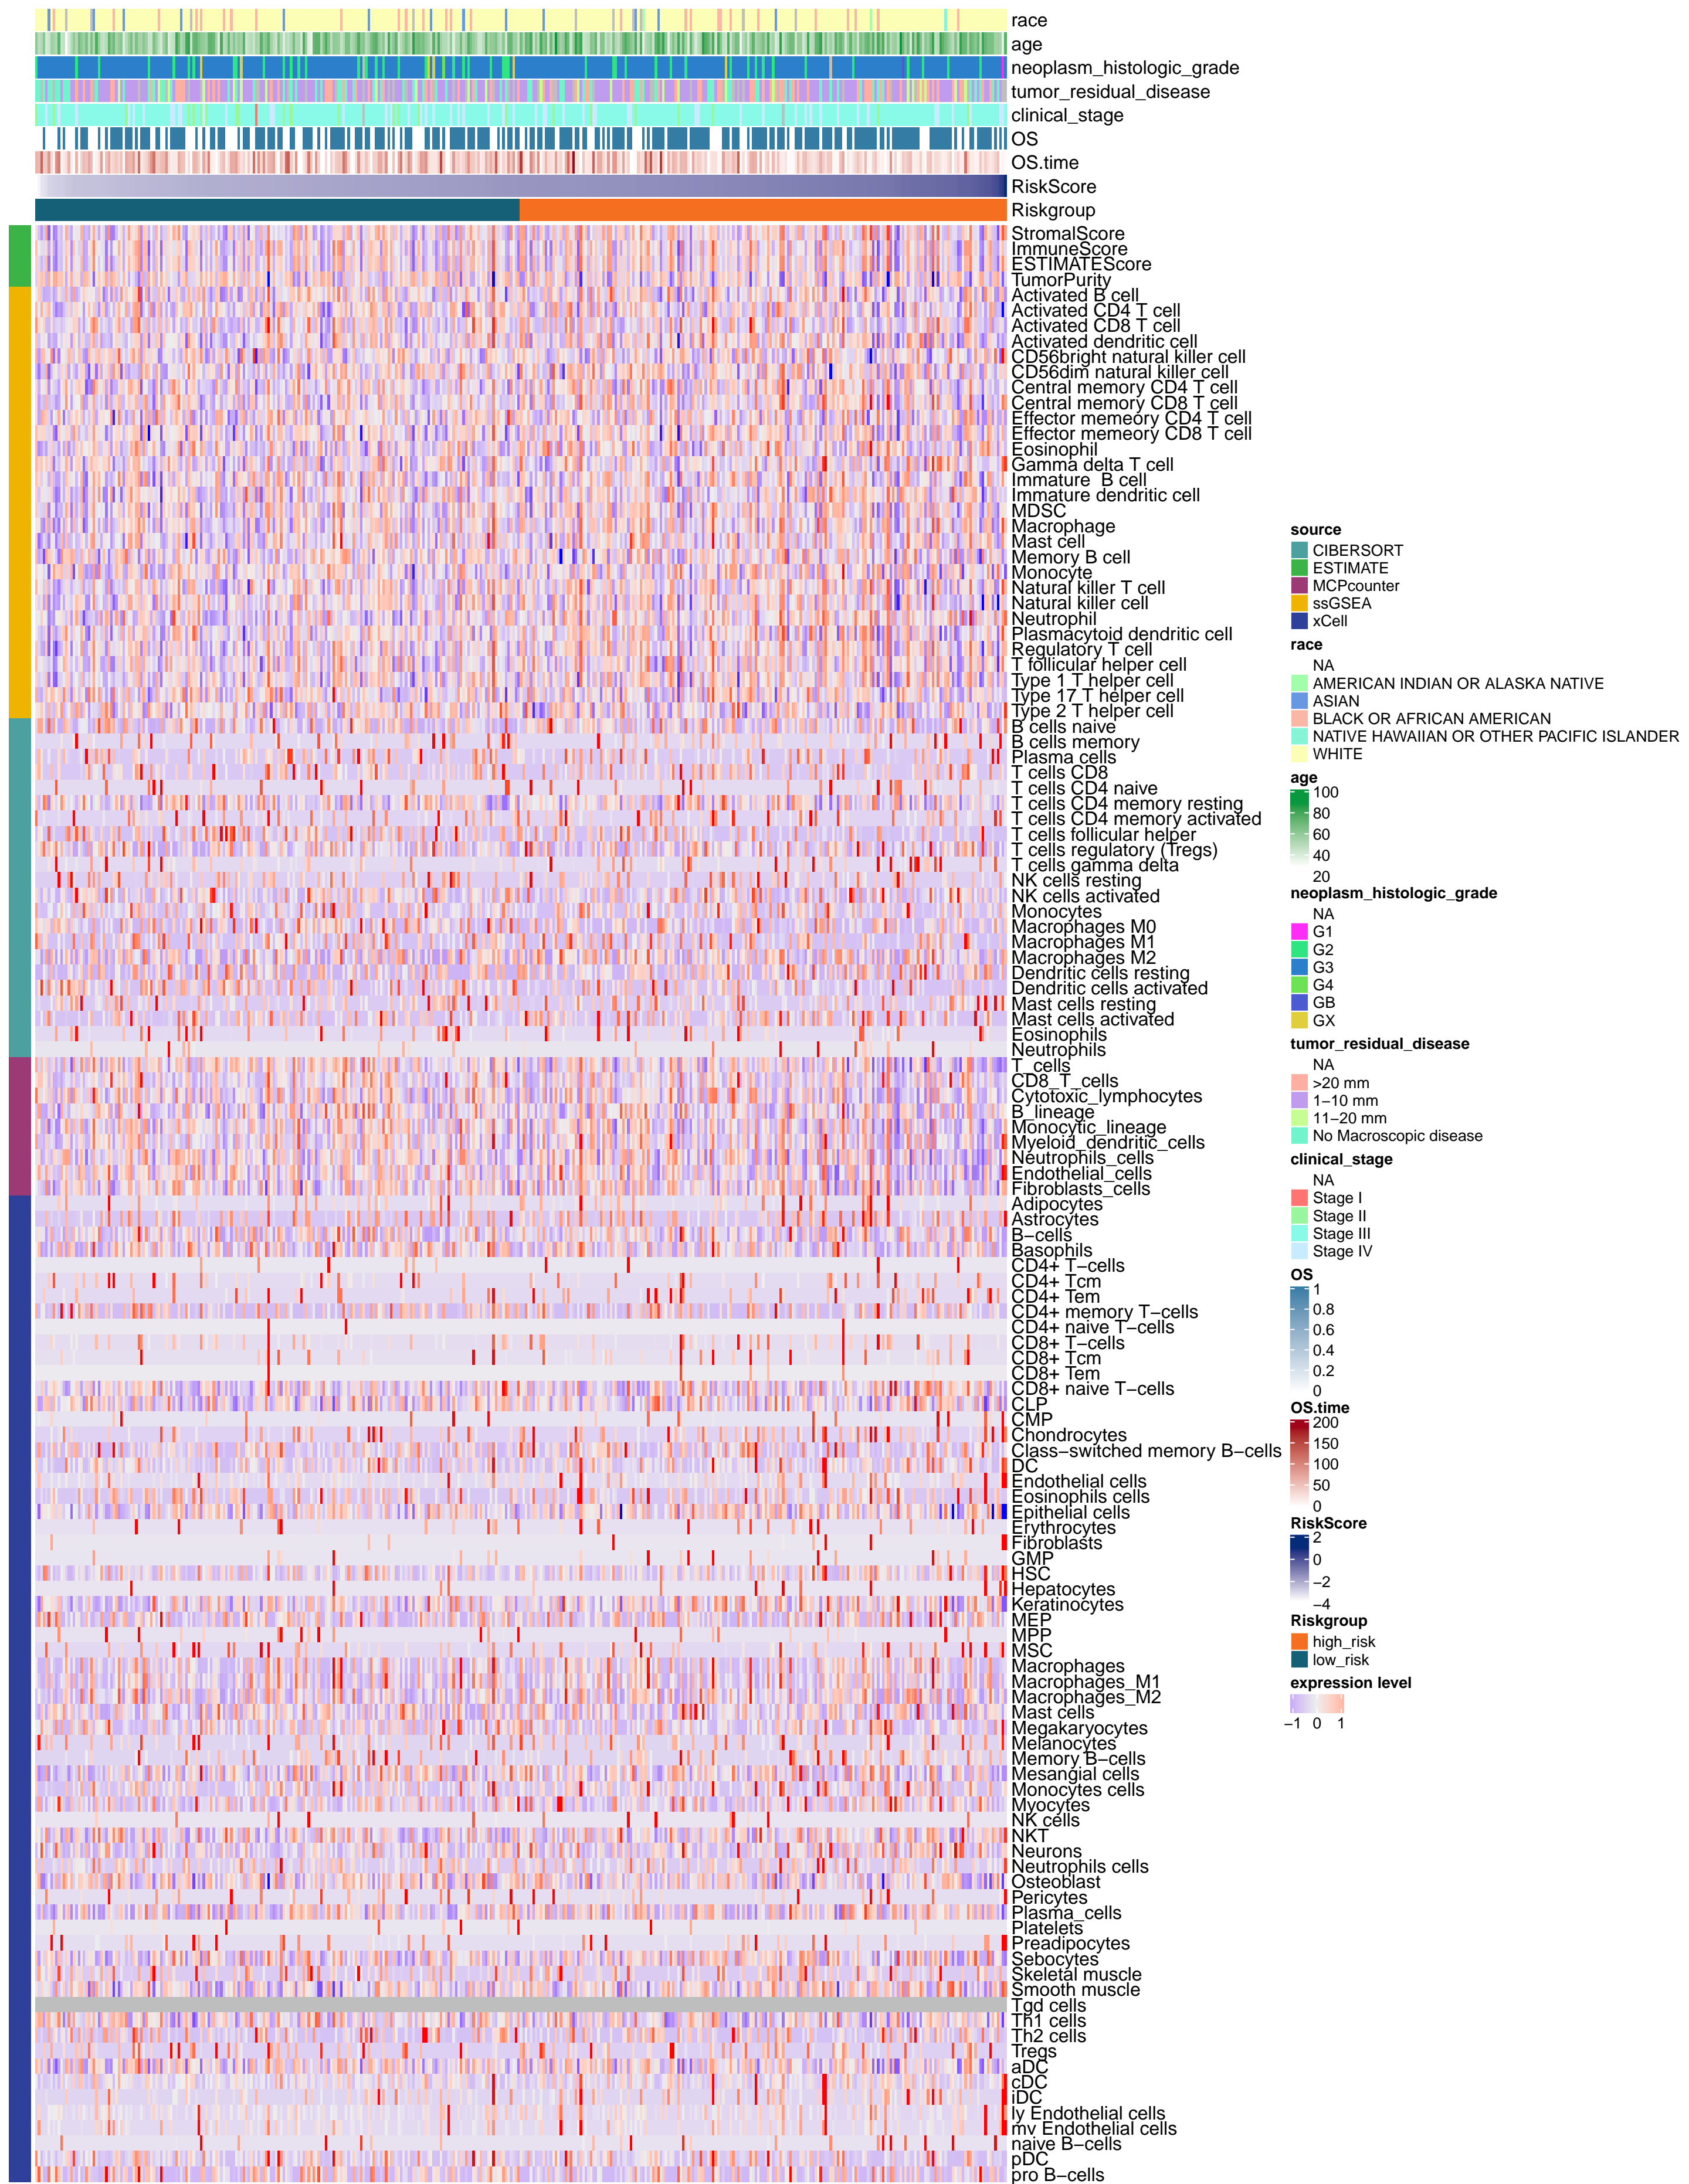

source
